# Supplementary material
Source: Research Square preprint supplement (doi:10.21203/rs.3.rs-9208506/v1)
Supplement: Supplementary file 2 [file dbfb168fa9abe857724deee2.docx]

**Table 1. Clinicopathologic characteristics of patients with Merkel cell carcinoma**

| **Case** | **Sex** | **Age (y)** | **Anatomic site** | **Clinical presentation** | **Tumor size (mm)** | **Management** | **Follow-up outcome＊** | **Comorbidities** | **MCPyV status†** |
| --- | --- | --- | --- | --- | --- | --- | --- | --- | --- |
| 1 | M | 57 | Finger | Violaceous mass | 30 × 15 | Mohs surgery + adjuvant RT | NED (17 mo) | Renal carcinoma | Negative |
| 2 | F | 65 | Eyelid | Skin mass | 25 × 15 | Mohs surgery + adjuvant RT + anti-PD-1 therapy | NED (32 mo) | HIV infection,  chronic hepatitis B | Positive |
| 3 | F | 66 | Leg | Skin mass | 35 × 10 | Mohs surgery + adjuvant RT | Lymph node metastasis (1 mo);  NED (30 mo) | Pulmonary tuberculosis | Positive |
| 4 | M | 64 | Chest | Skin mass | 110 × 85 | Mohs surgery + adjuvant RT | NED (69 mo) | Lung adenocarcinoma in situ | Positive |
| 5 | M | 72 | Elbow | Light erythematous mass | 22 × 11 | Mohs surgery + adjuvant RT | Lymph node metastasis (7 mo); NED (10 mo) | None | Negative |
| 6 | F | 67 | Back | Skin mass | 30 × 30 | Mohs surgery + adjuvant RT | NED (12 mo) | None | Negative |
| 7 | F | 58 | Cheek | Skin mass | 16 ×16 | Mohs surgery + adjuvant RT | NED (101 mo) | Squamous cell carcinoma | ND |
| 8 | F | 68 | Buttock | Skin mass | 30×10 | Mohs surgery + adjuvant RT | NED (42 mo) | None | ND |
| 9 | F | 60 | Leg | Dark red mass | 45 × 25 | Mohs surgery + adjuvant RT | lymph node and bone metastases (6 mo); Died of disease (12 mo) | three local recurrences; chronic hepatitis B; multiple hepatic and renal cysts; congenital left foot deformity | ND |
| 10 | F | 67 | Buttock | Skin mass | ND | Mohs surgery + adjuvant RT | NED (84 mo) | None | ND |

Abbreviations: MCPyV, Merkel cell polyomavirus; HIV, human immunodeficiency virus; RT, radiotherapy; NED, no evidence of disease; ND, not determined.

**＊** Follow-up was calculated from the time of definitive surgery to February 8, 2026.

**†** MCPyV status was assessed by immunohistochemistry when tissue was available.

**Table 2. Immunohistochemical profiles of Merkel cell carcinoma cases**

| **Antibody** | **Case 1†** | **Case 2** | **Case 3** | **Case 4** | **Case 5** | **Case 6** | **Case 7** | **Case 8** | **Case 9** | **Case 10** |
| --- | --- | --- | --- | --- | --- | --- | --- | --- | --- | --- |
| AE1/AE3 | + | + | + | − | + | + | + | + | − | + |
| CK20 | + | + | + | + | + | + | + | + | − | + |
| EMA | + | − | + | − | + | + | ND | ND | − | + |
| Ber-EP4 | + | − | + | − | + | + | ND | ND | ND | ND |
| TTF-1 | − | − | − | − | − | − | − | − | − | − |
| CgA | + | + | + | + | + | + | − | + | + | + |
| Syn | + | + | + | + | + | + | + | + | − | − |
| CD56 | − | + | + | + | + | + | + | + | + | + |
| p16 | + | + | + | + | + | + | ND | ND | ND | ND |
| MCPyV | − | + | + | + | − | − | ND | ND | ND | ND |
| p53⋇ | **Complete loss** | Heterogeneous | Heterogeneous | Heterogeneous | Heterogeneous | Heterogeneous | ND | ND | ND | ND |
| RB1 | **−** | + | + | + | + | + | ND | ND | ND | ND |
| Ki-67 (%) | 90 | 70 | 70 | 95 | 80 | 80 | 95 | 70 | 70 | 80 |

Abbreviations: ND, not determined. “Heterogeneous” indicates variable staining intensity.

**⋇** p53 immunoreactivity was categorized as “heterogeneous” (wild-type pattern), “diffuse strong” (overexpression pattern), or “complete loss” (null pattern).

**†** For Case 1, immunohistochemical findings represent combined assessment of both in situ and invasive components, which showed concordant staining patterns.
